# Supplementary material
Source: Springer Nature journal article supplement (https://www.springermedizin.de/resource/supplementary/12943_2012_1042_MOESM2_ESM.pdf/9552168)

**A**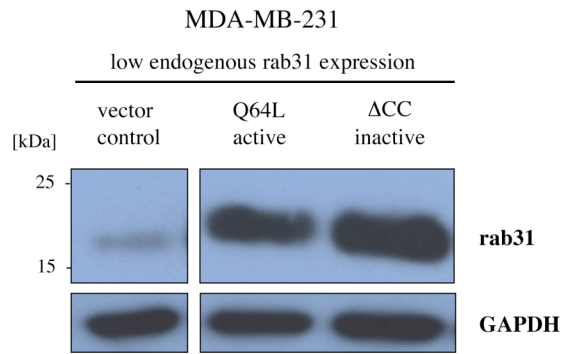**B**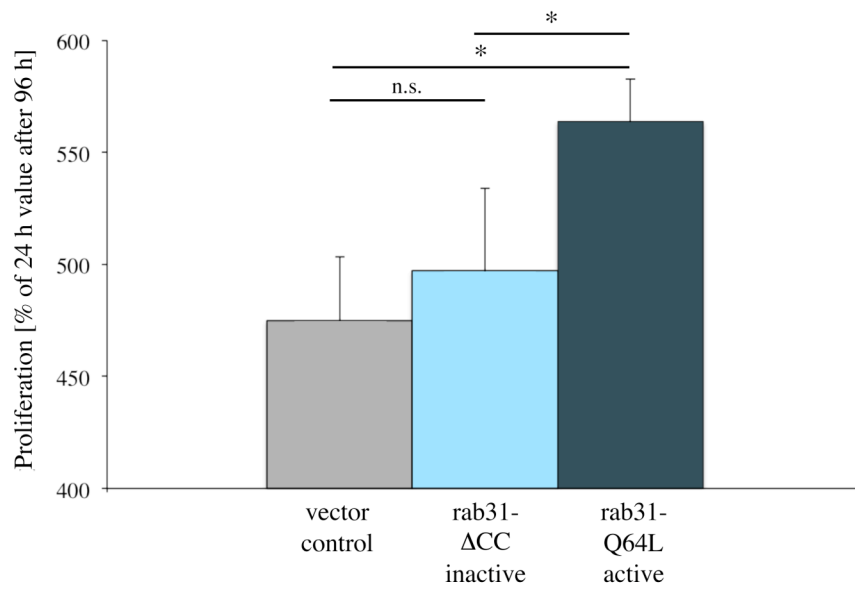**C**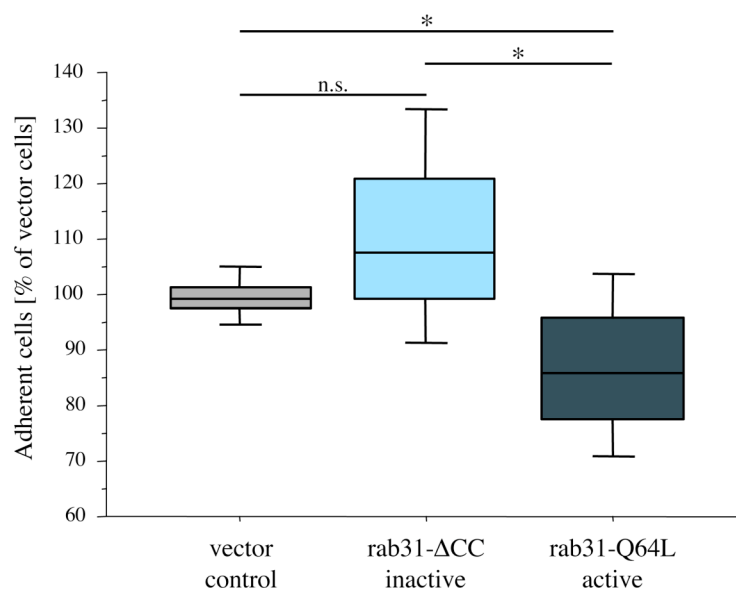

Supplement: MOESM2 [file 9552168]
